# Supplementary material for: Verification of the fCAL turbo immunoturbidimetric assay for measurement of the fecal calprotectin concentration in dogs and cats
Source: PubMed Central journal article supplement — J Vet Diagn Invest. 2022 Jul 25;34(5):813–24. doi: 10.1177/10406387221114031 (PMC9446300; doi:10.1177/10406387221114031), 2022-07-25
Supplement: sj-pdf-1-vdi-10.1177_10406387221114031.pdf [file sj-pdf-1-vdi-10.1177_10406387221114031.pdf]

Enderle LL, et al. Verification of the fCAL turbo immunoturbidimetric assay for measurement of the fecal calprotectin concentration in dogs and cats

**Supplemental Table 1.** Dilutional linearity of the fCAL turbo assay for canine and feline fecal extracts. The percentage observed:expected (O:E) ratios are given for the serial dilution of 6 canine fecal samples (C1–C6) and 6 feline fecal samples (F1–F6).

| Dogs   |                       |          |                    |                    |        | Cats   |                       |          |                    |                    |        |
|--------|-----------------------|----------|--------------------|--------------------|--------|--------|-----------------------|----------|--------------------|--------------------|--------|
| Sample | fCal, $\mu\text{g/g}$ | Dilution | O, $\mu\text{g/g}$ | E, $\mu\text{g/g}$ | O:E, % | Sample | fCal, $\mu\text{g/g}$ | Dilution | O, $\mu\text{g/g}$ | E, $\mu\text{g/g}$ | O:E, % |
| C1     | 73                    | 1:1      | 73                 | —                  | —      | F1     | 57                    | 1:1      | 57                 | —                  | —      |
|        |                       | 1:2      | 37                 | 37                 | 101    |        |                       | 1:2      | 23                 | 29                 | 81     |
| C2     | 125                   | 1:1      | 125                | —                  | —      | F2     | 63                    | 1:1      | 63                 | —                  | —      |
|        |                       | 1:2      | 57                 | 63                 | 91     |        |                       | 1:2      | 26                 | 32                 | 82     |
|        |                       | 1:4      | 41                 | 31                 | 131    |        |                       | 1:4      | NA                 | NA                 | NA     |
| C3     | 353                   | 1:1      | 353                | —                  | —      | F3     | 212                   | 1:1      | 212                | —                  | —      |
|        |                       | 1:2      | 186                | 176                | 105    |        |                       | 1:2      | 82                 | 106                | 77     |
|        |                       | 1:4      | 89                 | 88                 | 101    |        |                       | 1:4      | 57                 | 53                 | 108    |
|        |                       | 1:8      | 53                 | 44                 | 120    |        |                       | 1:8      | 23                 | 27                 | 87     |
|        |                       | 1:16     | 25                 | 22                 | 114    |        |                       | 1:16     | NA                 | NA                 | NA     |
| C4     | 685                   | 1:1      | 685                | —                  | —      | F4     | 300                   | 1:1      | 300                | —                  | —      |
|        |                       | 1:2      | 373                | 342                | 109    |        |                       | 1:2      | 155                | 150                | 104    |
|        |                       | 1:4      | 186                | 171                | 108    |        |                       | 1:4      | 76                 | 75                 | 101    |
|        |                       | 1:8      | 89                 | 86                 | 104    |        |                       | 1:8      | 39                 | 37                 | 105    |
|        |                       | 1:16     | 44                 | 43                 | 104    |        |                       | 1:16     | 19                 | 19                 | 103    |
| C5     | 1,759                 | 1:1      | 1,759              | —                  | —      | F5     | 1,249                 | 1:1      | 1,249              | —                  | —      |
|        |                       | 1:2      | 929                | 880                | 106    |        |                       | 1:2      | 704                | 624                | 113    |
|        |                       | 1:4      | 484                | 440                | 110    |        |                       | 1:4      | 380                | 312                | 122    |
|        |                       | 1:8      | 254                | 220                | 116    |        |                       | 1:8      | 177                | 156                | 114    |
|        |                       | 1:16     | 110                | 110                | 100    |        |                       | 1:16     | 86                 | 78                 | 110    |
|        |                       | 1:32     | 55                 | 55                 | 101    |        |                       | 1:32     | 45                 | 39                 | 115    |
| C6     | 4557                  | 1:1      | 4,557              | —                  | —      | F6     | 7,043                 | 1:1      | 7,043              | —                  | —      |
|        |                       | 1:2      | 2,031              | 2,279              | 89     |        |                       | 1:2      | 3,518              | 3,521              | 100    |
|        |                       | 1:4      | 1,137              | 1,139              | 100    |        |                       | 1:4      | 1,590              | 1,761              | 90     |
|        |                       | 1:8      | 604                | 570                | 106    |        |                       | 1:8      | 834                | 880                | 95     |
|        |                       | 1:16     | 302                | 285                | 106    |        |                       | 1:16     | 429                | 440                | 98     |
|        |                       | 1:32     | 146                | 142                | 103    |        |                       | 1:32     | 208                | 220                | 95     |

— = not applicable.
